# Supplementary material for: Untargeted metabolic profiling of saliva by liquid chromatography-mass spectrometry for the identification of potential diagnostic biomarkers of asthma
Source: Royal Society of Chemistry journal article supplement (doi:10.1039/c6ay00938g), 2016-01-01
Supplement: c6ay00938g1.pdf [file c6ay00938g1.pdf]

## Untargeted metabolic profiling of saliva by liquid chromatography-mass spectrometry for the identification of potential diagnostic biomarkers of asthma

Aditya Malkar<sup>1</sup>, Emma Wilson<sup>2</sup>, Tim Harrison<sup>2</sup>, Dominick Shaw<sup>2\*</sup> and Colin S. Creaser<sup>1\*</sup>.

<sup>1</sup>Centre for Analytical Science, Department of Chemistry, Loughborough University, Loughborough, Leicestershire, LE11 3TU, UK.

<sup>2</sup>Respiratory Research Unit, Nottingham City Hospital, Nottingham, NG5 1PB, UK

### Electronic Supplementary Information

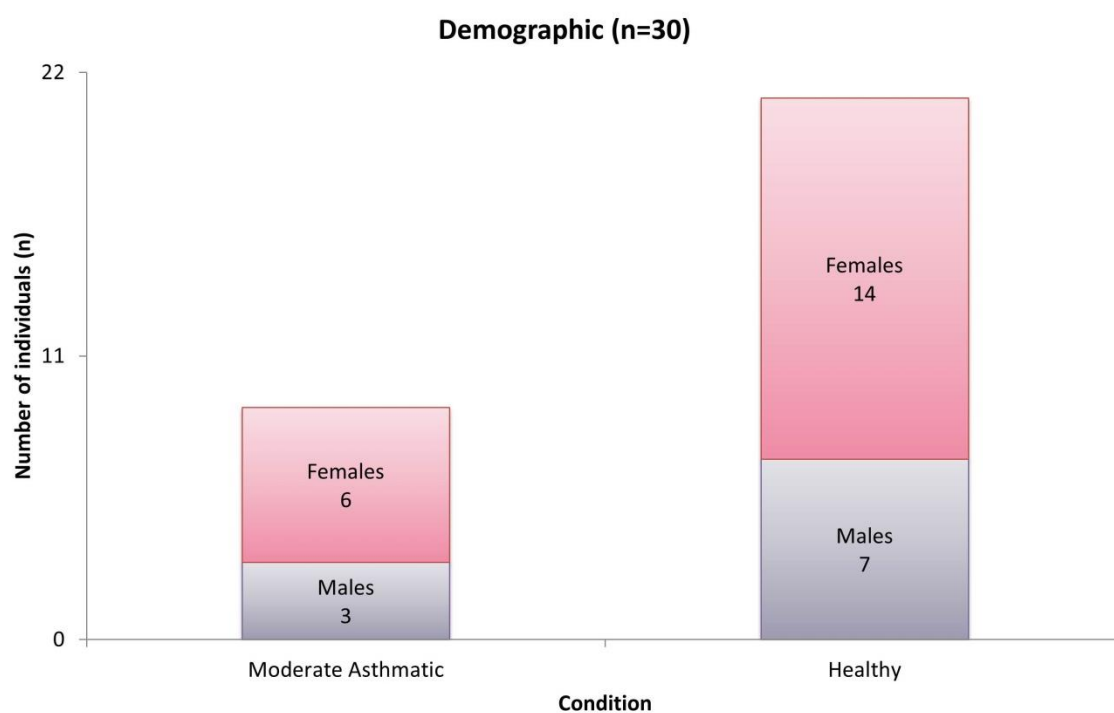

Supplementary Figure S1. Overview of demographic of the asthma metabolomic study.

Supplementary Table S1 (a) Asthmatic patients' metadata illustrating different treatment regimens between patients, (b) Information about the inhalers used as treatments.

(a) Asthmatic patients' metadata illustrating different treatment regimes between patients

| PatientID | Condition | Gender | V1FEV1%<br>PRED | V1EOS | V1PC20 | Age | Height<br>(cm) | Weight<br>(kg) | BDP<br>Equiv | V1 BDP<br>Daily | Daily Medication<br>Routine (1) | Daily Medication<br>Routine (2) | Total<br>Daily ICS | BDP<br>Equiv | Total<br>Daily<br>LABA |
|-----------|-----------|--------|-----------------|-------|--------|-----|----------------|----------------|--------------|-----------------|---------------------------------|---------------------------------|--------------------|--------------|------------------------|
| 28        | Asthmatic | Female | 68              | 0.8   | 6.35   | 41  | 171            | 146.4          | 800          | 800             | Symbicort 200 1BD               | Oxis 6 1BD                      | 400                | 400          | 12                     |
| 10        | Asthmatic | Male   | 67              | 6     | 2.52   | 60  | 174.5          | 90.5           | 200          | 200             | Seretide 50 1OD                 | Serevent 25 1OD                 | 50                 | 100          | 25                     |
| 20        | Asthmatic | Female | 88              | 1.5   | 2      | 42  | 149            | 69.2           | 400          | 400             | Clenil Modulite 50 2BD          | Serevent 25 2BD                 | 200                | 200          | 100                    |
| 18        | Asthmatic | Male   | 65              | 4.75  | 0.59   | 52  | 163            | 63             | 400          | 400             | Seretide 50 1BD                 | Seretide 25 1BD                 | 100                | 200          | 50                     |
| 13        | Asthmatic | Female | 66              |       | 0.5    | 28  | 171            | 81             | 400          | 400             | Clenil Modulite 50 2BD          | Serevent 25 2BD                 | 200                | 200          | 100                    |
| 33        | Asthmatic | Male   | 58              | 19.5  | 2      | 66  | 173            | 101            | 2000         | 2000            | Seretide 125 2BD                |                                 | 500                | 1000         |                        |
| 8         | Asthmatic | Female | 67              |       | 2.3    | 66  | 158            | 62.3           | 400          | 400             | Symbicort 100/6 1BD             |                                 | 200                | 200          |                        |
| 5         | Asthmatic | Female | 59              | 10.75 | 0.03   | 60  | 162            | 58             | 1000         | 1000            | Seretide 125 1BD                | Serevent 25 1BD                 | 250                | 500          | 50                     |
| 22        | Asthmatic | Female | 63              | 0.75  | 1      | 62  | 173            | 80.6           | 400          | 400             | QVAR 50 1BD                     | Serevent 25 1BD                 | 100                | 200          | 50                     |

  

(b) Information about the inhalers used as treatment by the asthmatic patients

| Inhaler         | Device             | Inhaler type | Inhaled corticosteroid     | Long acting beta agonist | Propellant |
|-----------------|--------------------|--------------|----------------------------|--------------------------|------------|
| Clenil Modulite | Aerosol Inhalation | MDI          | Beclometasone dipropionate | NONE                     | HFA 134a   |
| Seretide        | Aerosol Inhalation | Evohaler     | Fluticasone dipropionate   | Salmeterol               | HFA 134a   |
| Serevent        | Aerosol Inhalation | Evohaler     | NONE                       | Salmeterol               | HFA 134a   |
| Symbicort       | Dry Powder         | Turbohaler   | Budesonide                 | Formoterol fumarate      | HFA 227    |
| QVAR            | Aerosol Inhalation | MDI          | Beclometasone dipropionate | NONE                     | HFA 134a   |
| Oxis            | Dry Powder         | Turbohaler   | NONE                       | Formoterol fumarate      | NONE       |
| Pulmicort       | Dry Powder         | Turbohaler   | Budesonide                 | NONE                     | NONE       |

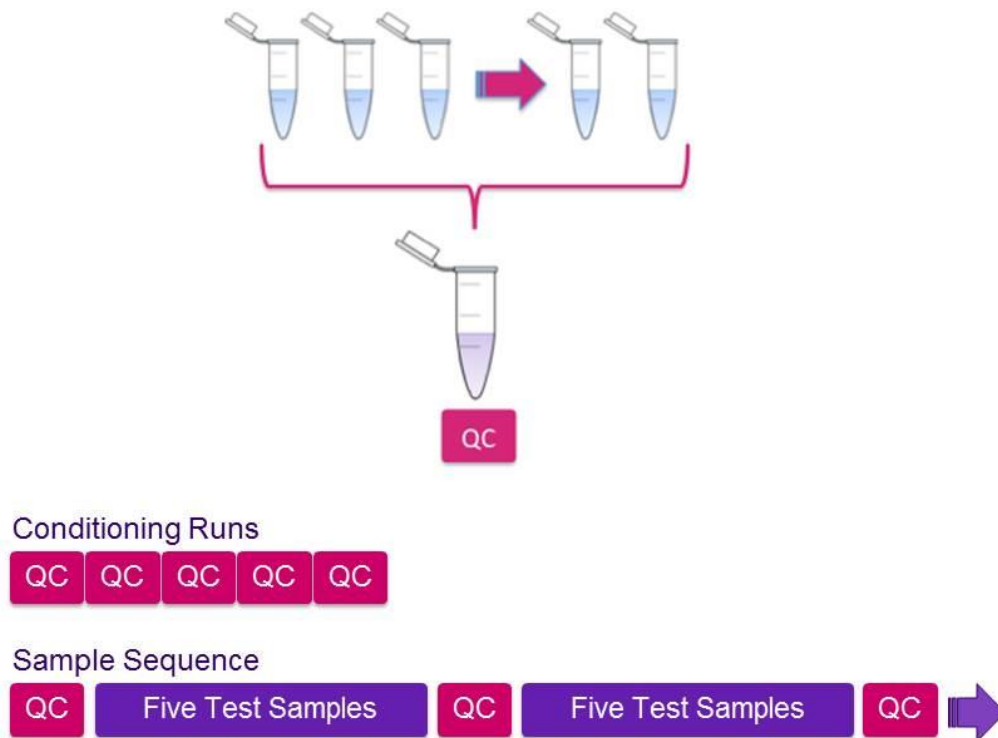

Supplementary Figure S2. Workflow used in the metabolic profiling of saliva.

Supplementary Table S2. Chromatographic retention time and peak area reproducibility for the UHPLC-MS metabolic profiling method for selected endogenous metabolites.

| Ion $m/z$ ( $\pm 0.02$ ) | Retention Time |      | Peak area |      |
|--------------------------|----------------|------|-----------|------|
|                          | $t_R$ (min)    | %RSD | Area      | %RSD |
| 195.09                   | 3.15           | 0.18 | 12909485  | 2.09 |
| 267.13                   | 1.96           | 0.32 | 2005909   | 3.73 |
| 416.36                   | 9.21           | 0.09 | 561820    | 2.76 |
| 652.42                   | 37.04          | 0.08 | 590003    | 3.81 |
| 716.39                   | 5.80           | 0.10 | 5891274   | 3.58 |

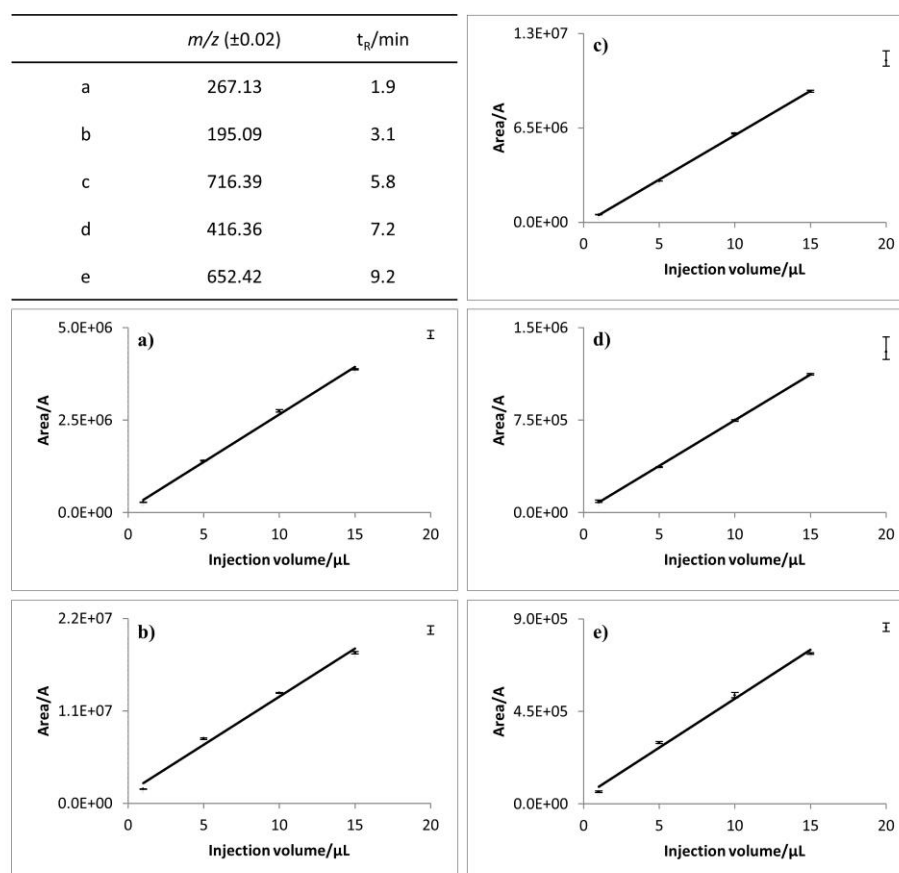

Supplementary Figure S3. Effect of injection volume for pooled saliva sample. Chromatographic peak area for selected ions across the entire chromatographic range were plotted against the injection volume. Samples were analysed in triplicates ( $n=3$ ) denoted by the error bars.

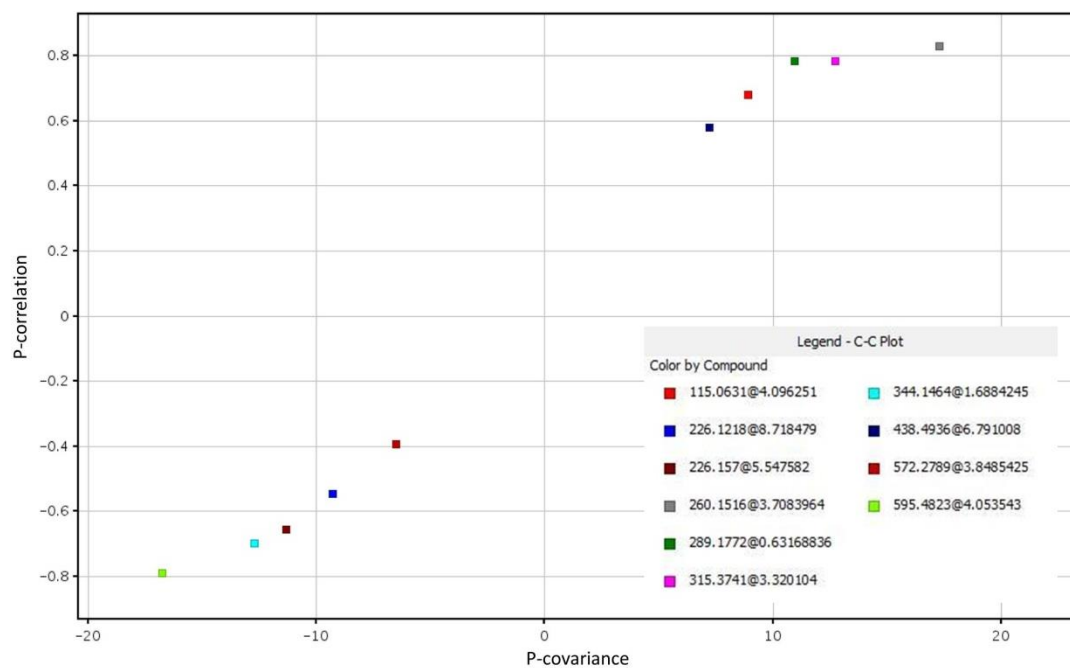

Supplementary Figure S4. S-plot representing the correlation and covariance of the molecular features responsible for class separation.

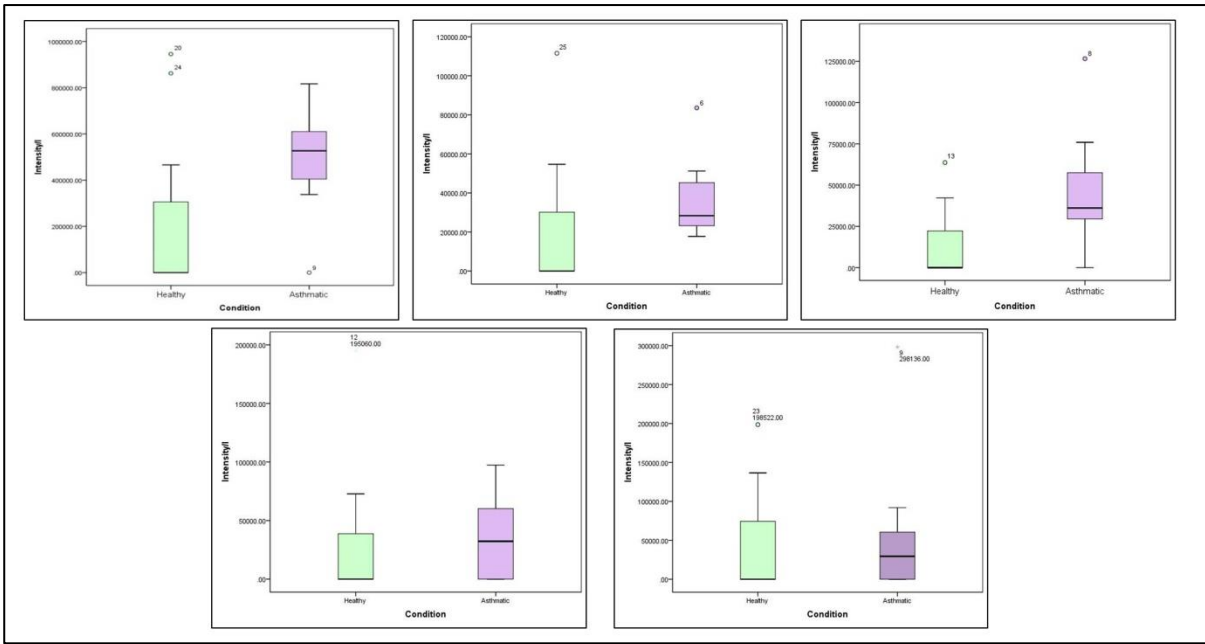

Supplementary Figure S5. Box and whisker plots for Up-regulated molecular features.

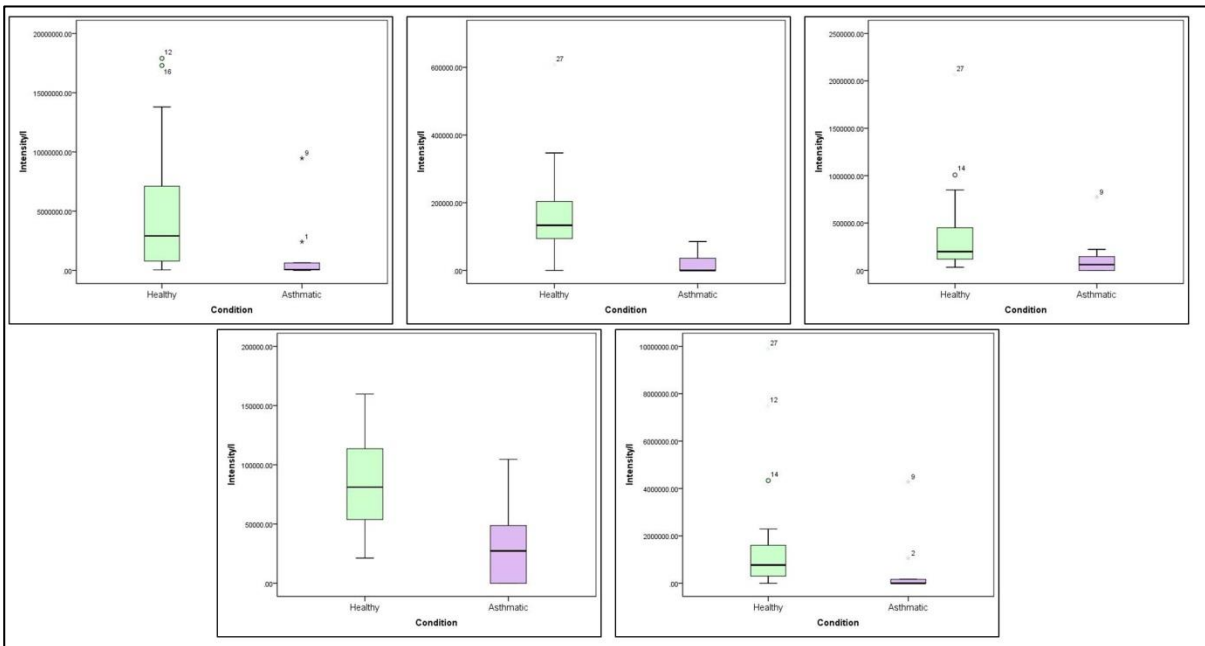

Supplementary Figure S6. Box and whisker plots for Down-regulated molecular features.

Supplementary Table S3. Discriminant molecular features (MFs) obtained from moderate asthmatics versus control samples.

| Retention time (min) | Measured mass | Accurate mass | Regulation | Tentative elemental composition (for ion)                                    | Tentative annotation (HMDB entries) <sup>a</sup>                                                                           |
|----------------------|---------------|---------------|------------|------------------------------------------------------------------------------|----------------------------------------------------------------------------------------------------------------------------|
| 0.4                  | 116.0699      | 116.0711      | Up         | C <sub>5</sub> H <sub>10</sub> NO <sub>2</sub>                               | D/L-Proline + H <sup>+</sup><br>Acetamidopropanal + H <sup>+</sup><br>4-Amino-2-methylene - butanoic acid + H <sup>+</sup> |
| 2.2                  | 261.1446      | 261.1450      | Up         | C <sub>11</sub> H <sub>20</sub> N <sub>2</sub> O <sub>5</sub>                | L-Gamma-glutamyl-L-leucine + H <sup>+</sup><br>L-Gamma-glutamyl-L-isoleucine + H <sup>+</sup>                              |
| 1.1                  | 290.1711      | 290.1716      | Up         | C <sub>12</sub> H <sub>24</sub> N <sub>3</sub> O <sub>5</sub>                | Metoprolol+Na <sup>+</sup>                                                                                                 |
| 3.6                  | 316.2217      | 316.2236      | Up         | C <sub>15</sub> H <sub>30</sub> N <sub>3</sub> O <sub>4</sub>                | Not annotated                                                                                                              |
| 4.4                  | 439.4569      |               | Up         | N/A <sup>a</sup>                                                             | Not annotated                                                                                                              |
| 3.4                  | 227.1268      | 227.1283      | Down       | C <sub>12</sub> H <sub>19</sub> O <sub>4</sub>                               | 3,4-Methylenesebacic acid + H <sup>+</sup><br>Allixin + H <sup>+</sup>                                                     |
| 4.7                  | 573.2561      | 573.2603      | Down       | C <sub>26</sub> H <sub>45</sub> N <sub>4</sub> O <sub>4</sub> S <sub>3</sub> | Not annotated                                                                                                              |
| 0.5                  | 596.3253      | 596.3244      | Down       | C <sub>28</sub> H <sub>42</sub> N <sub>11</sub> O <sub>2</sub> S             | Not annotated                                                                                                              |
| 1.7                  | 345.1163      | 345.1159      | Down       | C <sub>22</sub> H <sub>18</sub> ClN <sub>2</sub>                             | Clotrimazole + H <sup>+</sup>                                                                                              |
| 5.5                  | 227.1396      | 227.1396      | Down       | C <sub>11</sub> H <sub>19</sub> N <sub>2</sub> O <sub>3</sub>                | Not annotated                                                                                                              |

<sup>a</sup> Putative level 2 annotations<sup>1</sup> based on mass spectrometry physiochemical properties (5 ppm window and isotope abundance) and spectral similarity with the Human Metabolome Database spectral library.<sup>2-4</sup>

#### Citations:

1. L. W. Sumner et al., *Metabolomics* 2007, 3, 211-221.
2. D. S. Wishart, D. Tzur, C. Knox, et al., HMDB: the Human Metabolome Database. *Nucleic Acids Res.* 2007, **35**, D521-526.
3. D. S. Wishart, C. Knox, A. C. Guo, et al., HMDB: a knowledgebase for the human metabolome. *Nucleic Acids Res.* 2009, **37**, D603-610.
4. D. S. Wishart, T. Jewison, A. C. Guo, M. Wilson, C. Knox et al., HMDB 3.0 — The Human Metabolome Database in 2013. *Nucleic Acids Res.* 2013, **41**, D801-817.
